# Supplementary material
Source: PubMed Central journal article supplement (PMC3947571)
Supplement: NIHMS556509-supplement-02.pdf [file NIHMS556509-supplement-02.pdf]

|                          |                                                |
|--------------------------|------------------------------------------------|
| <b>Cell type</b>         | Human Umbilical Vein Endothelial Cells (HUVEC) |
| <b>Vendor no.</b>        | Invitrogen C-015-5C                            |
| <b>Species</b>           | Human                                          |
| <b>Tissue</b>            | Umbilical vein (blood vessel)                  |
| <b>Type of cell line</b> | Primary adherent                               |
| <b>Average cell size</b> | 17 µm                                          |
| <b>Special notes</b>     | —                                              |

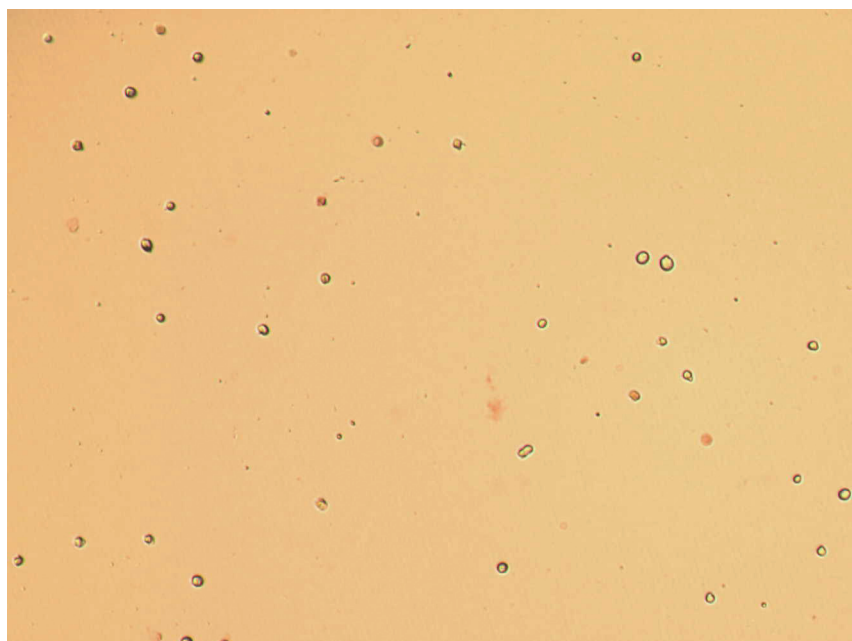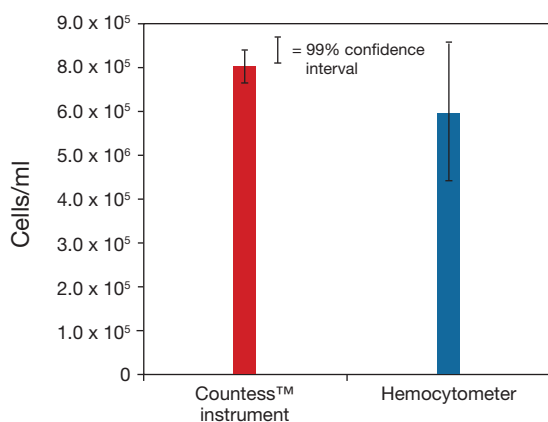

Counting comparison.

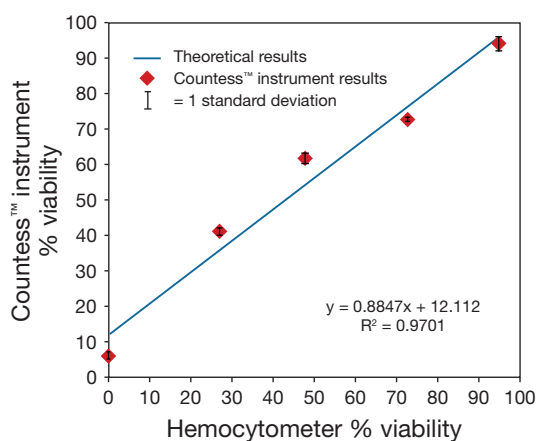

Countess™ Automated Cell Counter vs. hemocytometer.
